# Supplementary material for: Quorum-sensing non-coding small RNAs use unique pairing regions to differentially control mRNA targets
Source: PubMed Central journal article supplement (PMC3262071; doi:10.1111/j.1365-2958.2011.07959.x), 2012-01-09
Supplement: NIHMS346554-supplement-Supp_Figure_S1-S6_Table_S1-S3.pdf [file NIHMS346554-supplement-Supp_Figure_S1-S6_Table_S1-S3.pdf]

## SUPPORTING INFORMATION

Figure S1 Qrr sRNAs activate *V. cholerae* *aphA* expression through base pairing

Figure S2 Qrr sRNA pairing predictions with *luxMN* and *vca0939*

Figure S3 Phylogenetic analyses of *aphA*, *luxR* and *luxO*

Figure S4 *aphA* sequence alignment

Figure S5 Qrr sRNAs use unique pairing regions to regulate different targets

Figure S6 Expression level of multiple AphA-GFP mutants in *E. coli*

Supplemental Table S1 Strains used in this study

Supplemental Table S2 Plasmids used in this study

Supplemental Table S3 Primers used in this study

A

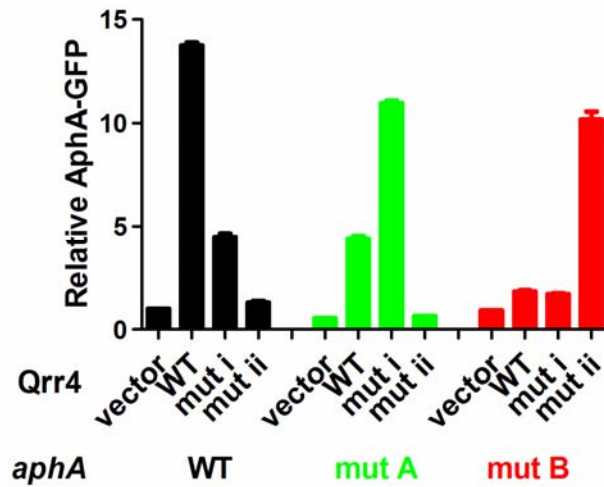

B

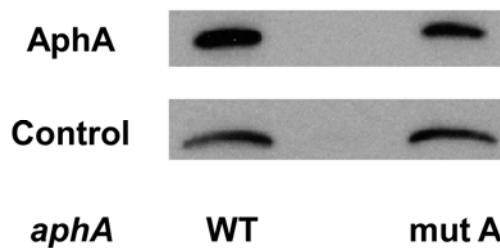

Figure S1 Qrr sRNAs activate *V. cholerae* *aphA* expression through base pairing (A) Fluorescence from plasmid-encoded *V. cholerae* AphA-GFP (pYS143) or mutant AphA-GFP (pYS150, mutation A; pYS147, mutation B, denoted mut A and mut B as in Figure 3A) translational fusions were measured in *E. coli* MC4100 carrying an empty vector (pRHA109), a vector expressing a rhamnose-inducible *qrr4* gene (pSTR0227) or a mutant *qrr4* gene (pYS121, mutation I; pYS120, mutation II, denoted mut i and mut ii as in Figure 3A). GFP from three independent cultures was measured for each strain and the means and SEMs are shown. (B) AphA protein levels in a *V. cholerae*  $\Delta$ *cqsA*  $\Delta$ *luxQ* strain with wild type *aphA* (YZW477) or *aphA* carrying mutation A (see Figure 3A) (YS2013). Cells were harvested at OD<sub>600</sub>~1.0, and protein levels were determined using Western blot.

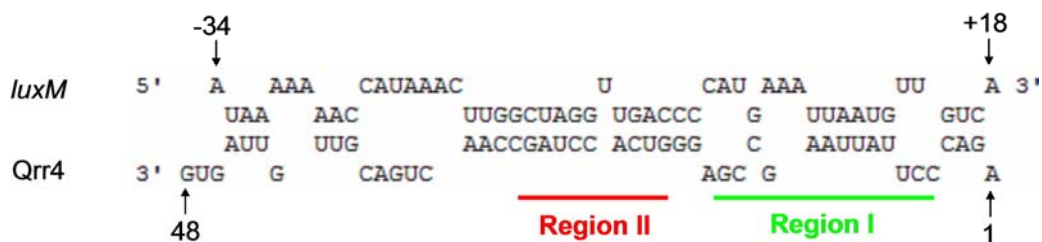

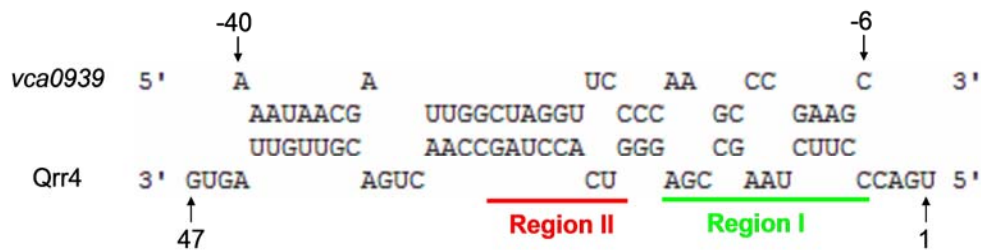

Figure S2 Qrr sRNA pairing predictions with *luxMN* and *vca0939*  
 Sequence alignment of *V. harveyi* Qrr4 (nucleotides 1-48) with the *V. harveyi* *luxMN* mRNA and *V. cholerae* Qrr4 (nucleotides 1-47) with the *V. cholerae* *vca0939* mRNA, Region I and Region II are highlighted as in Figure 3A and 4A.

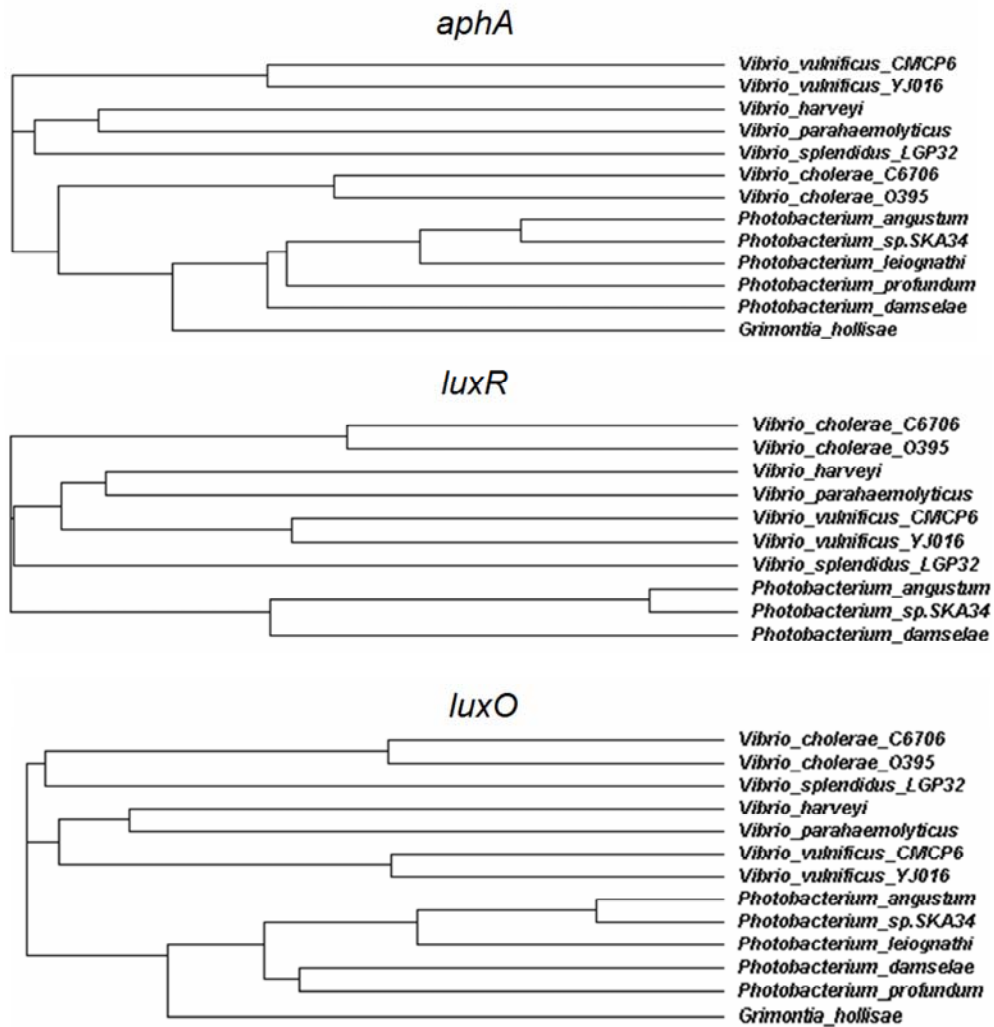

Figure S3 Phylogenetic analyses of *aphA*, *luxR* and *luxO*  
 Phylogenetic trees were built for *Vibrionaceae* species containing *aphA* genes.

```

Vibrio_cholerae_C6706      TATTCACCTTTATGCTTATTATTAGATATACTACGTTCCCTCTGTGAT- 49
Vibrio_cholerae_O395      TATTCACCTTTATGCTTATTATTAGATATACTACGTTCCCTCTGTGAT- 49
Vibrio_harveyi            TATTCACCTTCATGCTTATTATTTA--TATACTACTTCCCTGCTGGAAGC 48
Vibrio_paraahaemolyticus  TATTCACCTTCATGCTTATTATTTA--TATACTACTTGCCTGCTGAGAGC 48
Vibrio_splendidus_LGP32  TATTCACCTTTATGCTTATTATTAGATATACTACTGCTCCGCTCGAGA- 49
Vibrio_vulnificus_CMCP6  TATTCACCTTTATGCTTATTATTAGATATACTACTCATCCGCTGCGGA- 49
Vibrio_vulnificus_YJ016  TATTCACCTTTATGCTTATTATTAGATATACTACTCATCCGCTGCGGA- 49
***** ** * ***** * * * * *
                               ↑
                          Promoter      Transcription Start

Vibrio_cholerae_C6706      AAGTAATGTAAAGCAATCTCACAGTTAAAGT--ATGCAAAGACATACGCC 97
Vibrio_cholerae_O395      AAGTAATGTAAAGCAATCTCACAGTTAAAGT--ATGCAAAGACATACGCC 97
Vibrio_harveyi            TCACAAATCCAATCAAATAAGCTCCAGCTC--GATGGAAAC-ATCCATCA 95
Vibrio_paraahaemolyticus  TCATAAATCCAATCATACTGCTCCAGCCCT--GATGGGGAT-CCCCATC- 95
Vibrio_splendidus_LGP32  -AACACTCCAAAATAATAAT-CTGCGGCACCTCGACC-AATAAACTGGTCA 96
Vibrio_vulnificus_CMCP6  TCACACATCAAATATTTATTTCTGCAGC-CT-GATGGAAATCGCTCCATCC 97
Vibrio_vulnificus_YJ016  TCACACATCAA- TATTATTTCCGTAGC-CT-GATGGAAATCACTCCATCC 96
          *   ** *   *   *   *   *   *

Vibrio_cholerae_C6706      ACTCTAGGTGATAACCGGCTTTATAAGGTGACATAAGCAGC--CGAATTI 145
Vibrio_cholerae_O395      ACTCTAGGTGATAACCGGCTTTATAAGGTGACATAAGCAGC--CGAATTI 145
Vibrio_harveyi            ACTCTAGGTGATAAACGGCTTTA-A-GGTGACAGGACCAAC-AITG--TT 140
Vibrio_paraahaemolyticus  --TCTAGGTGATAAACGGCTTTA-A-GGTGACAGGACCAAC-TITG--TT 138
Vibrio_splendidus_LGP32  A-CCTAGGTGATAAACGGCTTTGTAAGGTGACATAACCAACGATTGAGTT 145
Vibrio_vulnificus_CMCP6  ACCCTAGGTGATAAACGGCTTTA-AAGGTGACAGGACCAAC-AITG--TT 143
Vibrio_vulnificus_YJ016  ACCCTAGGTGATAAACGGCTTTA-AAGGTGACAGGACCAAC-AITG--TT 142
          ***** * * * * * * * * * *

                          Qrr Pairing Region

Vibrio_cholerae_C6706      TGGCGTGCAGGTATTTAAATGCGTTGATATGAGTGCCATTAGAAGCACAA 195
Vibrio_cholerae_O395      TGGCGTGCAGGTATTTAAATGCGTTGATATGCGTGCATTAGAAGCACAA 195
Vibrio_harveyi            GGTGCTACTACACATTAATAAATACTTA----AGCGTCAATGAAGAACGC 186
Vibrio_paraahaemolyticus  GGTGCTACTTATAACATTAATAAATACTCA----AGCGCCAGTAAGAGCG 184
Vibrio_splendidus_LGP32  GGTGCTACTTGAACATAACCAATATAA----CGTGCCA-TAGAAGCACAC 190
Vibrio_vulnificus_CMCP6  GGTGCTGACTGCACATAAACAATAA-----GCATCAACAAGAATGTAA 186
Vibrio_vulnificus_YJ016  GGTGCTGACTGCACATAAACAATAA-----GCATCAACAAGAATGTAA 185
          * * * * * * * * * * * * * * * *

Vibrio_cholerae_C6706      CAACC-GTTAGATAGAG-GTTTAT--GTTGACTTAATTTTTGGATTGAA 241
Vibrio_cholerae_O395      CAACC-GTTAGATAGAA-GTTTAT--GTTGACTTAATTTTTGGATTGAA 241
Vibrio_harveyi            ATGAAAGTGTAGATAGCTTGTTTACAAGTTTATTGACCAITTTGGATTG 236
Vibrio_paraahaemolyticus  CTGAAAGTATAAGTAGCTTGTTTACAAGTTTATTGACCAITTTGGATTG 234
Vibrio_splendidus_LGP32  TTGIT-GITCAAGTA-TTTGTTTAC-----TGTTTACCAITTTGGATT 233
Vibrio_vulnificus_CMCP6  ACGCC-GTGCAGGCAGCTTGTTTACAAGTTTATTGACCAITTTGGATTG 235
Vibrio_vulnificus_YJ016  ACGCC-GTGCAGGCAGCTTGTTTACAAGTTTATTGACCAITTTGGATTG 234
          ** * * * * * * * * * * * * * * * *

Vibrio_cholerae_C6706      GACATGTCATTACCACACGTTATCCTTACTGTTCTTAGCACACGCGATGC 291
Vibrio_cholerae_O395      GACATGTCATTACCACACGTTATCCTTACTGTTCTTAGCACACGCGATGC 291
Vibrio_harveyi            GACATGTCATTACCACACGTAATCTAAGTACTGTTCTTAGCCTCGCGACGC 286
Vibrio_paraahaemolyticus  GACATGTCATTACCACACGTAATCTAAGTACTGTTCTTAGCCTCGCGACGC 284
Vibrio_splendidus_LGP32  GACATGTCATTACCACACGTAATTTAACCCTTTAAGTACACGCGATGC 283
Vibrio_vulnificus_CMCP6  GACATGTCATTACCACACGTAATCTAACCCTTTAAGTACACTCGTGATGC 285
Vibrio_vulnificus_YJ016  GACATGTCATTACCACACGTAATCTAACCCTTTAAGTACACTCGTGATGC 284
          ***** * * * * * * * * * * * *
          ↑ Start Codon

```

Figure S4 *aphA* sequence alignment  
Sequence alignment of *aphA* genes in *Vibrionaceae* species with multiple Qrr sRNAs.  
Predicted promoters, conserved Qrr pairing regions, and start codons are indicated.

A

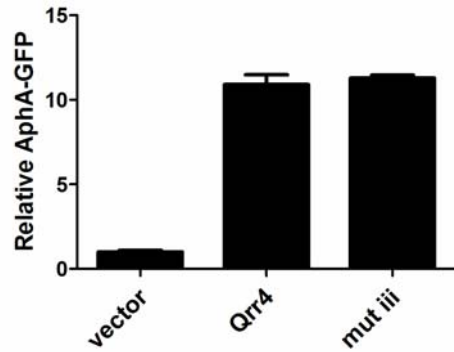

B

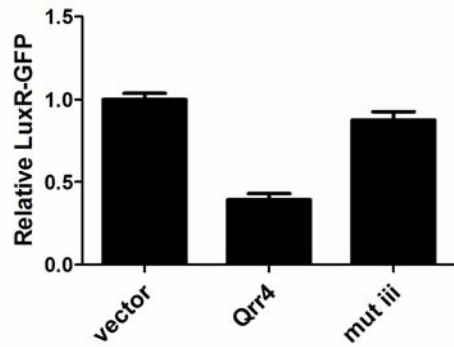

C

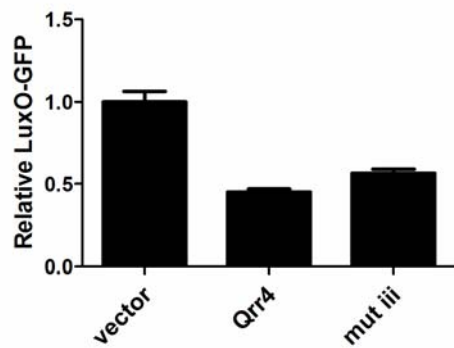

Figure S5 Qrr sRNAs use unique pairing regions to regulate different targets (A)(B)(C) Fluorescence from plasmid-encoded *V. harveyi* AphA-GFP (pYS069), LuxR-GFP (pYS141) and LuxO-GFP (pYS142) translational fusions were measured in *E. coli* MC4100 carrying an empty vector (pRHA109), a vector expressing a rhamnose-inducible *qrr4* gene (pSTR0227), or a mutant *qrr4* gene (pYS153, denoted mut iii as in Figure 3A and 4A). GFP from three independent cultures was measured for each strain and the means and SEMs are shown.



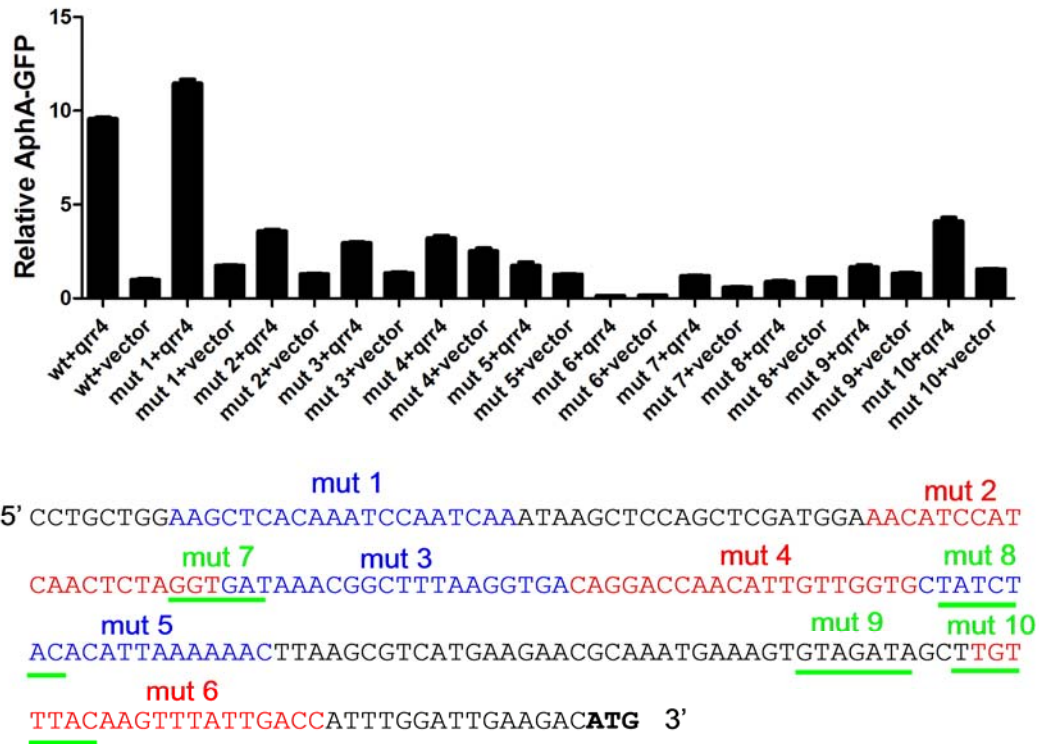

Figure S6 Expression level of multiple AphA-GFP mutants in *E. coli*. Fluorescence from a plasmid-encoded *V. harveyi* AphA-GFP translational fusion (pYS069, wt) was measured in *E. coli* MC4100 carrying an empty vector (pRHA109) or a vector expressing a rhamnose-inducible *qrr4* gene (pSTR0227). Ten mutations in the *aphA* 5'UTR were engineered to disrupt the putative inhibitory structure. Fluorescence from these constructs was similarly measured. The mutations denoted mut 1 through mut 6 are deletions colored in blue and red. Mutations denoted mut 7 through mut 10 are point mutations colored in green. GFP from three independent cultures was measured for each strain and the means and SEMs are shown.

Supplemental Table S1. Strains used in this study.

| Strain             | Relevant Genotype                                        | Source                             |
|--------------------|----------------------------------------------------------|------------------------------------|
| <i>E. coli</i>     |                                                          |                                    |
| S17λpir            | wild type                                                | (de Lorenzo & Timmis, 1994)        |
| MC4100             | wild type                                                | (Casadaban, 1976)                  |
| <i>V. harveyi</i>  |                                                          |                                    |
| BB120              | wild type                                                | (Bassler <i>et al.</i> , 1997)     |
| KM83               | <i>luxOD47E</i>                                          | (Tu & Bassler, 2007)               |
| KM669              | $\Delta luxR$                                            | (Pompeani <i>et al.</i> , 2008)    |
| KM812              | <i>luxOD47E</i> $\Delta luxR$                            | K. Mok, unpublished                |
| YS040              | <i>luxOD47E</i> $\Delta qrr1-5$ $\Delta hapR$            | this study                         |
| YS010              | $\Delta luxM$ $\Delta luxPQ$ $\Delta cqsS$ $\Delta luxR$ | this study                         |
| YS034              | YS010 with <i>aphA</i> mutation A                        | this study                         |
| <i>V. cholerae</i> |                                                          |                                    |
| C6706str2          | wild type                                                | (Thelin & Taylor, 1996)            |
| SLS340             | <i>luxOD47E</i>                                          | S. Svenningsen, unpublished        |
| SLS390             | $\Delta hapR$                                            | (Svenningsen <i>et al.</i> , 2008) |
| SLS640             | <i>luxOD47E</i> $\Delta hapR$                            | S. Svenningsen, unpublished        |
| SLS641             | <i>luxOD47E</i> $\Delta qrr1-4$ $\Delta hapR$            | S. Svenningsen, unpublished        |
| YZ477              | $\Delta cqsA$ $\Delta luxQ$                              | Y. Wei, unpublished                |
| YS2013             | YZ477 with <i>aphA</i> mutation A                        | this study                         |

Supplemental Table S2. Plasmids used in this study.

| Plasmid  | Description                                | Source                            |
|----------|--------------------------------------------|-----------------------------------|
| pEVS143  | empty vector                               | (Dunn <i>et al.</i> , 2006)       |
| pYS069   | pEVS143 with <i>V. harveyi</i> AphA-GFP    | (Rutherford <i>et al.</i> , 2011) |
| pYS113   | pYS069 with mutation A                     | this study                        |
| pYS112   | pYS069 with mutation B                     | this study                        |
| pYS141   | pEVS143 with <i>V. harveyi</i> LuxR-GFP    | this study                        |
| pYS142   | pEVS143 with <i>V. harveyi</i> LuxO-GFP    | this study                        |
| pYS143   | pEVS143 with <i>V. cholerae</i> AphA-GFP   | this study                        |
| pYS150   | pYS143 with mutation A                     | this study                        |
| pYS147   | pYS143 with mutation B                     | this study                        |
| pRHA109  | empty vector                               | (Giacalone <i>et al.</i> , 2006)  |
| pYS122   | pRHA109 with <i>V. harveyi</i> <i>qrr1</i> | this study                        |
| pSTR0227 | pRHA109 with <i>V. harveyi</i> <i>qrr4</i> | (Rutherford <i>et al.</i> , 2011) |
| pYS121   | pSTR0227 with mutation i                   | this study                        |
| pYS120   | pSTR0227 with mutation ii                  | this study                        |
| pYS153   | pSTR0227 with mutation iii                 | this study                        |
| pLAFR2   | empty vector                               | (Friedman <i>et al.</i> , 1982)   |

|         |                                                  |                                |
|---------|--------------------------------------------------|--------------------------------|
| pBB39-3 | pLAFR2 with <i>V. harveyi</i> <i>aphA</i>        | (Bassler <i>et al.</i> , 1993) |
| pYS130  | pBB39-3 with mutation A                          | this Study                     |
| pKAS32  | empty vector                                     | (Skorupski & Taylor, 1996)     |
| pYS148  | pKAS32 with <i>V. cholerae</i> <i>aphA</i>       | this study                     |
| pYS152  | pYS148 with mutation A                           | this study                     |
| pYS159  | pLAFR2 with $\Delta$ qrr1-luxOD47E               | this study                     |
| pKD3    | FRT sites flanking Cm <sup>R</sup> gene template | (Datsenko & Wanner, 2000)      |
| pKD46   | Red recombinase expression plasmid               | (Datsenko & Wanner, 2000)      |
| ppH1JI  | pLAFR2 incompatible plasmid                      | (Hirsch & Beringer, 1984)      |
| pTL18   | IPTG inducible FLP recombinase                   | (Long <i>et al.</i> , 2009)    |
| pYS096  | pYS069 with mutation 1                           | this study                     |
| pYS098  | pYS069 with mutation 2                           | this study                     |
| pYS099  | pYS069 with mutation 3                           | this study                     |
| pYS100  | pYS069 with mutation 4                           | this study                     |
| pYS101  | pYS069 with mutation 5                           | this study                     |
| pYS103  | pYS069 with mutation 6                           | this study                     |
| pYS174  | pYS069 with mutation 7                           | this study                     |
| pYS176  | pYS069 with mutation 8                           | this study                     |
| pYS177  | pYS069 with mutation 9                           | this study                     |
| pYS178  | pYS069 with mutation 10                          | this study                     |

Supplemental Table S3. Primers used in this study.

| Primer  | Sequence                                     | Use                         |
|---------|----------------------------------------------|-----------------------------|
| YS100   | GCGGGTACCGCTAGCAAAGGAGAAGAAGCTC              | pYS069/pYS141/pYS142/pYS143 |
| YS101   | GCGCCTAGGGTCGAGCTGTTTCCTGTGT                 | pYS069/pYS141/pYS142/pYS143 |
| YS086   | GCGCCTAGGCCTGCTGGAAGCTCACAAAT                | pYS069                      |
| YS099   | GCGGGTACCTACAGTTAGAATTACGTGTGGTAA            | pYS069                      |
| YS335   | ATCAACTCTAGGTGATAAACCCGATTAAGGTGACAGGACCAACA | pYS113                      |
| YS336   | TGTTGGTCTGTACACCTTAATCGGGTTTATCACCTAGAGTTGAT | pYS113                      |
| YS333   | TGGAACATCCATCAACTCTCCAGATAAACGGCTTTAAGGTGA   | pYS112                      |
| YS334   | TCACCTTAAAGCCGTTTATCTGGAAGAGTTGATGGATGTTTCCA | pYS112                      |
| YS357   | GCGCCTAGGCAATTAGGGGATTATCCCCAAAACATC         | pYS141                      |
| YS358   | GCGGGTACCAGTACGAGGTCTCTTTGCAATTGAG           | pYS141                      |
| YS359   | GCGCCTAGGAAAACACAACGAAAATCGGCTAGGC           | pYS142                      |
| YS360   | GCGGGTACCAGACTTTTGACCTTCTGTTATTTGTTGCAT      | pYS142                      |
| YS399   | GCGCCTAGGCCTCTGTGATAAGTAATGTAAAGCAATC        | pYS143                      |
| YS400   | GCGGGTACCAACAGTAAGGATAACGTGTGGTAATGA         | pYS143                      |
| YS443   | CGCCACTCTAGGTGATAACCCCGATTATAAGGTGACATAAGCAG | pYS150/pYS152               |
| YS444   | CTGCTTATGTCACCTTATAATCGGGGTTATCACCTAGAGTGGCG | pYS150/pYS152               |
| YS441   | GCAAAGACATACGCCACTCTCCAGATAACCGGCTTTATAAGGT  | pYS147                      |
| YS442   | ACCTTATAAAGCCGGTTATCTGGAAGAGTGGCGTATGTCTTTGC | pYS147                      |
| STR0067 | CAGACGGTACCATATGCGGTGTG                      | pSTR0227/pYS122             |
| STR0068 | GTATCGTATACGACCAGTCTAAAAAGCG                 | pSTR0227/pYS122             |



|         |                                                             |          |
|---------|-------------------------------------------------------------|----------|
| STR0069 | GGACCCCTCGGGTCACC                                           | pYS122   |
| STR0070 | CAGTGGTACCTGCAGACAAAAAGAA                                   | pYS122   |
| YS369   | GGACCCCTCGGGTCACCTAGCCAAGTACGTTGTTAGTG                      | pYS122   |
| YS370   | CACTAACACGTCAGTTGGCTAGGTGACCCGAGGGGTCC                      | pYS122   |
| STR0075 | AGACCCCTTATTAAGCCGAGGGTCAC                                  | pSTR0227 |
| STR0076 | CAGTGGTACCGCTCTAGAAAGAAAAACGCCAATCACAATAAAGTTG              | pSTR0227 |
| YS351   | CTGGTCGTAGACCCCTTATTATCGGGAGGGTCACCTAGCCAAGT                | pYS121   |
| YS352   | CAGTTGGCTAGGTGACCCTCCCGATAATAAGGGTCTACGACCAG                | pYS121   |
| YS349   | CCCTTATTAAGCCGAGGGTCTGGAAGCCAAGTACGTTGTTAGT                 | pYS120   |
| YS350   | ACTAACACGTCAGTTGGCTTCCAGACCCTCGGCTTAATAAGGG                 | pYS120   |
| YS479   | CCGAGGGTCACCTAGCCAACACTCGTTGTTAGTGAATACACAT                 | pYS153   |
| YS480   | ATGTGTATCACTAACACGAGTGTGGCTAGGTGACCCTCGG                    | pYS153   |
| YS377   | CCTGCTGGAAGCTCACAATC                                        | pYS130   |
| YS366   | TACAGTTAGAATTACGTGTGGTAATGACAT                              | pYS130   |
| YS367   | ATGTCATTACCACACGTAATTCTAACTGTA                              | pYS130   |
| YS290   | GAGGATATTCATATGGACGAATTAGCCGATCACTTCAAG                     | pYS130   |
| YS291   | CATATGAATATCCTCCTTAGTTCCTATT                                | pYS130   |
| YS292   | TGTAGGCTGGAGCTGCTTCG                                        | pYS130   |
| YS293   | CAGCTCCAGCCTACAACCTTAAATAAAACGAAAAGGCTTGCCG                 | pYS130   |
| YS376   | CACTCTAGGTGTTCTGCCACAAG                                     | pYS130   |
| YS409   | GCGGGTACCGCGCTACTTGAAGAGATGTGC                              | pYS148   |
| YS412   | GCGCCTAGGGCTGGAGTACCTGCTCGTATT                              | pYS148   |
| YS451   | GCGGGATCCGTAAAGAGACGCTGGTGGAGTTTG                           | pYS159   |
| YS452   | ATGCTGTATACTTTTATGCCCGAGCTATGGTCGTAG                        | pYS159   |
| YS453   | AAAAGTATACAGCATGGTTTGTGCC                                   | pYS159   |
| YS467   | AGACGGAGCTCGAGCAGAATAAGATCAGGAATGCGATGGTTC                  | pYS159   |
| YS468   | TGCTCGAGCTCCGTCTACCTGATATGACGGGGATGGAC                      | pYS159   |
| YS454   | GAGGATATTCATATGCGTTGCGCTTAATGTCTTGCTCG                      | pYS159   |
| YS455   | CAGCTCCAGCCTACAACAAAGCCCTCCGGTGTGGAA                        | pYS159   |
| YS456   | GCGGGATCCCTCGGAGCGTTTCGCGAACTG                              | pYS159   |
| YS155   | CTCGACCCTAGGCCTGCTGGATAAGCTCCAGCTCGATGGA                    | pYS096   |
| YS156   | TCCATCGAGCTGGAGCTTATCCAGCAGGCCTAGGGTCCGAG                   | pYS096   |
| YS159   | ATAAGCTCCAGCTCGATGGAGATAAACGGCTTTAAGGTGA                    | pYS098   |
| YS160   | TCACCTTAAAGCCGTTTATCTCCATCGAGCTGGAGCTTAT                    | pYS098   |
| YS161   | AACATCCATCAACTCTAGGTCAGGACCAACATTGTTGGTG                    | pYS099   |
| YS162   | CACCAACAATGTTGGTCCCTGACCTAGAGTTGATGGATGTT                   | pYS099   |
| YS163   | GATAAACGGCTTTAAGGTGACTATCTACACATTAATAAAC                    | pYS100   |
| YS164   | GTTTTTAAATGTGTAGATAGTCACCTTAAAGCCGTTTATC                    | pYS100   |
| YS165   | CAGGACCAACATTGTTGGTGTAAAGCGTCATGAAGAACGC                    | pYS101   |
| YS166   | GCGTTCCTCATGACGCTTAACACCAACAATGTTGGTCCCTG                   | pYS101   |
| YS171   | AAATGAAAGTGTAGATAGCTATTTGGATTGAAGACATGTC                    | pYS103   |
| YS172   | GACATGTCTTCAATCCAAATAGCTATCTACACTTTCATTT                    | pYS103   |
| YS565   | CTCGATGGAAACATCCATCAACTCTACCACTAAAACGGCTTTAAGGTGACAGGACCAA  | pYS174   |
| YS566   | TTGGTCCCTGTACCTTAAAGCCGTTTATAGTGGTAGAGTTGATGGATGTTTCCATCGAG | pYS174   |

|       |                                                              |        |
|-------|--------------------------------------------------------------|--------|
| YS571 | GGTGACAGGACCAACATTGTTGGTGCATAGATGACATTAAAAACTTAAGCGTCATGAA   | pYS176 |
| YS572 | TTCATGACGCTTAAGTTTTTTAATGTCATCTATGCACCAACAATGTTGGTCCTGCACC   | pYS176 |
| YS573 | GCGTCATGAAGAACGCAAATGAAAGTCATCTATGCTTGTTTACAAGTTTATTGACCATT  | pYS177 |
| YS574 | AATGGTCAATAAACTTGTAACAAGCATAGATGACTTTCATTTGCGTTCTTCATGACGC   | pYS177 |
| YS575 | AGAACGCAAATGAAAGTGTAGATAGCAACAAATGAAGTTTATTGACCATTTGGATTGAAG | pYS178 |
| YS576 | CTTCAATCCAAATGGTCAATAAACTTCATTTGTTGCTATCTACACTTTCATTTGCGTTCT | pYS178 |

## References

- Bassler, B. L., E. P. Greenberg & A. M. Stevens, (1997) Cross-species induction of luminescence in the quorum-sensing bacterium *Vibrio harveyi*. *J Bacteriol* **179**: 4043-4045.
- Bassler, B. L., M. Wright, R. E. Showalter & M. R. Silverman, (1993) Intercellular signalling in *Vibrio harveyi*: sequence and function of genes regulating expression of luminescence. *Mol Microbiol* **9**: 773-786.
- Casadaban, M. J., (1976) Transposition and fusion of the lac genes to selected promoters in *Escherichia coli* using bacteriophage lambda and Mu. *J Mol Biol* **104**: 541-555.
- Datsenko, K. A. & B. L. Wanner, (2000) One-step inactivation of chromosomal genes in *Escherichia coli* K-12 using PCR products. *Proc Natl Acad Sci U S A* **97**: 6640-6645.
- de Lorenzo, V. & K. N. Timmis, (1994) Analysis and construction of stable phenotypes in gram-negative bacteria with Tn5- and Tn10-derived minitransposons. *Methods Enzymol* **235**: 386-405.
- Dunn, A. K., D. S. Millikan, D. M. Adin, J. L. Bose & E. V. Stabb, (2006) New rfp- and pES213-derived tools for analyzing symbiotic *Vibrio fischeri* reveal patterns of infection and lux expression in situ. *Appl Environ Microbiol* **72**: 802-810.
- Friedman, A. M., S. R. Long, S. E. Brown, W. J. Buikema & F. M. Ausubel, (1982) Construction of a broad host range cosmid cloning vector and its use in the genetic analysis of *Rhizobium* mutants. *Gene* **18**: 289-296.
- Giacalone, M. J., A. M. Gentile, B. T. Lovitt, N. L. Berkley, C. W. Gunderson & M. W. Surber, (2006) Toxic protein expression in *Escherichia coli* using a rhamnose-based tightly regulated and tunable promoter system. *Biotechniques* **40**: 355-364.
- Hirsch, P. R. & J. E. Beringer, (1984) A physical map of pPH1JI and pJB4JI. *Plasmid* **12**: 139-141.
- Long, T., K. C. Tu, Y. Wang, P. Mehta, N. P. Ong, B. L. Bassler & N. S. Wingreen, (2009) Quantifying the integration of quorum-sensing signals with single-cell resolution. *PLoS Biol* **7**: e68.
- Pompeani, A. J., J. J. Irgon, M. F. Berger, M. L. Bulyk, N. S. Wingreen & B. L. Bassler, (2008) The *Vibrio harveyi* master quorum-sensing regulator, LuxR, a TetR-type protein is both an activator and a repressor: DNA recognition and binding specificity at target promoters. *Mol Microbiol* **70**: 76-88.
- Rutherford, S. T., J. C. van Kessel, Y. Shao & B. L. Bassler, (2011) AphA and LuxR/HapR reciprocally control quorum sensing in vibrios. *Genes Dev* **25**: 397-408.

- Skorupski, K. & R. K. Taylor, (1996) Positive selection vectors for allelic exchange. *Gene* **169**: 47-52.
- Svenningsen, S. L., C. M. Waters & B. L. Bassler, (2008) A negative feedback loop involving small RNAs accelerates *Vibrio cholerae*'s transition out of quorum-sensing mode. *Genes Dev* **22**: 226-238.
- Thelin, K. H. & R. K. Taylor, (1996) Toxin-coregulated pilus, but not mannose-sensitive hemagglutinin, is required for colonization by *Vibrio cholerae* O1 El Tor biotype and O139 strains. *Infect Immun* **64**: 2853-2856.
- Tu, K. C. & B. L. Bassler, (2007) Multiple small RNAs act additively to integrate sensory information and control quorum sensing in *Vibrio harveyi*. *Genes Dev* **21**: 221-233.
